# Supplementary material for: Interactome-Wide Prediction of Protein-Protein Binding Sites Reveals Effects of Protein Sequence Variation in Arabidopsis thaliana
Source: PLoS One. 2012 Oct 15;7(10):e47022. doi: 10.1371/journal.pone.0047022 (PMC3471968; doi:10.1371/journal.pone.0047022)
Supplement: Table S4 — List of interacting proteins in which a nsSNP overlaps the binding site of both proteins. (XLSX) [file pone.0047022.s008.xlsx]

## Sheet: Proteins (SNPs overlap sites)
ProteinA	ProteinB	List of interacting proteins in which a nsSNP overlaps the binding site of both proteins.
AT1G04240	AT1G51950
AT1G04240	AT3G23030
AT1G04240	AT3G23050
AT1G04240	AT4G14560
AT1G04240	AT4G28640
AT1G04240	AT5G27030
AT1G05710	AT1G31880
AT1G06510	AT1G32580
AT1G06510	AT3G60360
AT1G06510	AT4G02150
AT1G06510	AT4G20300
AT1G13730	AT3G13990
AT1G14340	AT5G51180
AT1G14340	AT5G66110
AT1G14740	AT4G24240
AT1G14830	AT1G59610
AT1G15570	AT1G64180
AT1G15570	AT4G25200
AT1G15570	AT5G48385
AT1G15570	AT5G57210
AT1G15750	AT1G15750
AT1G15750	AT1G22640
AT1G15750	AT3G15540
AT1G15750	AT3G23030
AT1G15750	AT3G23050
AT1G15750	AT4G14560
AT1G15750	AT4G28640
AT1G15750	AT4G29080
AT1G15750	AT4G38620
AT1G15750	AT5G16560
AT1G16500	AT4G02150
AT1G17970	AT4G33690
AT1G19680	AT3G22960
AT1G22630	AT1G27030
AT1G22630	AT1G68670
AT1G22630	AT4G08150
AT1G22750	AT4G35580
AT1G22750	AT5G22290
AT1G22760	AT4G01090
AT1G23880	AT5G22290
AT1G27040	AT5G22290
AT1G30860	AT4G17220
AT1G31880	AT2G24570
AT1G31880	AT3G27580
AT1G31880	AT4G08460
AT1G31880	AT5G23120
AT1G32580	AT5G55100
AT1G48280	AT4G25200
AT1G51600	AT2G27110
AT1G51600	AT3G01990
AT1G51950	AT3G15540
AT1G51950	AT3G23030
AT1G51950	AT3G23050
AT1G51950	AT4G14560
AT1G51950	AT4G28640
AT1G53510	AT3G08530
AT1G53510	AT3G54850
AT1G53510	AT4G32190
AT1G53510	AT4G32880
AT1G60010	AT2G20570
AT1G60010	AT3G22960
AT1G60940	AT2G17770
AT1G61590	AT3G22960
AT1G62990	AT2G16400
AT1G62990	AT3G24140
AT1G62990	AT4G08150
AT1G62990	AT4G25200
AT1G63470	AT4G25200
AT1G66470	AT3G27420
AT1G68670	AT5G15330
AT1G70410	AT5G23120
AT1G71050	AT3G49160
AT1G71050	AT5G58720
AT1G75400	AT3G22960
AT1G77210	AT4G35580
AT1G77210	AT5G22290
AT1G80640	AT4G35580
AT2G03505	AT5G22290
AT2G03640	AT3G13990
AT2G16400	AT4G08150
AT2G20570	AT2G21830
AT2G20570	AT4G14900
AT2G21830	AT4G01090
AT2G24050	AT3G08530
AT2G24290	AT4G26450
AT2G24290	AT4G35580
AT2G24290	AT5G22290
AT2G24570	AT2G35155
AT2G25000	AT2G25000
AT2G25000	AT3G27420
AT2G25000	AT4G02150
AT2G25700	AT3G15430
AT2G25700	AT5G65210
AT2G26770	AT2G26770
AT2G30580	AT3G22960
AT2G30580	AT5G58720
AT2G30880	AT3G54120
AT2G30880	AT4G32570
AT2G33880	AT3G16250
AT2G33880	AT5G16560
AT2G34710	AT3G51180
AT2G34710	AT4G10500
AT2G35240	AT4G14740
AT2G40010	AT5G47700
AT2G41280	AT4G35580
AT2G42260	AT3G08530
AT2G42260	AT3G50910
AT2G42260	AT4G17220
AT2G43370	AT3G50910
AT2G43370	AT5G53060
AT2G43370	AT5G58720
AT2G45820	AT2G45820
AT2G45820	AT4G02150
AT2G45920	AT4G01090
AT3G01300	AT3G22960
AT3G01300	AT4G28640
AT3G01820	AT4G25200
AT3G02520	AT3G56850
AT3G02520	AT4G38900
AT3G06790	AT5G61380
AT3G08530	AT3G08530
AT3G08530	AT4G20300
AT3G08530	AT5G48385
AT3G13990	AT4G14900
AT3G13990	AT5G48385
AT3G15450	AT5G43830
AT3G15540	AT3G23030
AT3G15540	AT3G23050
AT3G15540	AT4G02150
AT3G15540	AT4G14560
AT3G15540	AT4G28640
AT3G16200	AT5G22290
AT3G19570	AT3G22440
AT3G20260	AT4G35110
AT3G20420	AT5G41070
AT3G22440	AT4G02150
AT3G22440	AT4G14900
AT3G22440	AT4G32190
AT3G22440	AT5G15330
AT3G22440	AT5G48385
AT3G22960	AT3G56130
AT3G22960	AT3G60360
AT3G22960	AT4G20300
AT3G22960	AT4G24240
AT3G22960	AT5G20920
AT3G23030	AT3G23050
AT3G23030	AT4G28640
AT3G23050	AT4G28640
AT3G23340	AT4G18630
AT3G24140	AT5G46690
AT3G26910	AT3G54230
AT3G27420	AT4G32190
AT3G27580	AT3G61150
AT3G28050	AT5G41600
AT3G28080	AT4G35580
AT3G28080	AT5G22290
AT3G29035	AT5G13180
AT3G29160	AT3G48550
AT3G29160	AT4G10470
AT3G44940	AT4G02150
AT3G48550	AT4G02150
AT3G50910	AT4G20300
AT3G50910	AT5G05760
AT3G51180	AT4G01090
AT3G51180	AT4G17680
AT3G51180	AT4G28300
AT3G51180	AT4G32880
AT3G54120	AT5G41600
AT3G54850	AT3G54850
AT3G56850	AT5G38480
AT3G60360	AT4G01090
AT3G60360	AT4G17220
AT3G60360	AT5G53060
AT3G60360	AT5G58720
AT3G60390	AT4G16780
AT3G60390	AT5G47370
AT3G61310	AT3G61310
AT3G61950	AT5G51780
AT4G01090	AT4G14900
AT4G01090	AT4G20300
AT4G01090	AT5G05190
AT4G01090	AT5G16560
AT4G02150	AT4G17220
AT4G02150	AT4G17680
AT4G02150	AT4G32570
AT4G02150	AT5G47810
AT4G03410	AT4G26450
AT4G03410	AT5G22290
AT4G08150	AT5G38420
AT4G08460	AT5G58720
AT4G09060	AT5G16560
AT4G11890	AT5G20030
AT4G13500	AT5G22290
AT4G14560	AT4G29080
AT4G14840	AT4G20300
AT4G14900	AT4G32190
AT4G14900	AT5G48385
AT4G16780	AT4G16780
AT4G16780	AT4G17680
AT4G16780	AT5G47370
AT4G16840	AT5G22290
AT4G17220	AT4G32190
AT4G17680	AT4G32190
AT4G17680	AT5G38420
AT4G20300	AT4G26450
AT4G20300	AT5G57210
AT4G24680	AT4G28300
AT4G24680	AT5G53060
AT4G25200	AT4G25200
AT4G25200	AT4G32190
AT4G25200	AT5G05190
AT4G25200	AT5G10710
AT4G27410	AT5G13180
AT4G28640	AT4G29080
AT4G29080	AT5G27030
AT4G29930	AT5G46690
AT4G31800	AT4G31800
AT4G32190	AT4G32570
AT4G32570	AT5G48385
AT4G32880	AT5G41070
AT4G33690	AT4G33690
AT4G33690	AT5G12230
AT4G35110	AT5G65400
AT4G35580	AT4G39900
AT4G35580	AT5G04160
AT4G39900	AT5G22290
AT5G02040	AT5G22290
AT5G02040	AT5G41600
AT5G03180	AT5G22290
AT5G05760	AT5G66480
AT5G13180	AT5G63790
AT5G22290	AT5G41800
AT5G22290	AT5G42240
AT5G22290	AT5G53030
AT5G24760	AT5G24760
AT5G41600	AT5G41600
AT5G46190	AT5G54580
AT5G47810	AT5G47810
AT5G53060	AT5G54580
AT5G55990	AT5G57630
